# Supplementary material for: Health of Young Adults Experiencing Social Marginalization and Vulnerability: A Cross-National Longitudinal Study
Source: MDPI journal article supplement (doi:10.3390/ijerph20031711), 2023-01-17
Supplement: s1 [file s1]

## Supplementary Materials

**Table S1.** Univariate regression models of age 25 social vulnerability and marginalization associations with general and physical health outcomes at age 28.

|                                                 | Poor Perceived Health Status |                  | Chronic Illness     |                  | Serious Injury      |              | Disability or Ongoing Medical Problems Resulting from Serious Injury |              |
|-------------------------------------------------|------------------------------|------------------|---------------------|------------------|---------------------|--------------|----------------------------------------------------------------------|--------------|
|                                                 | b (SE)                       | p                | B (SE)              | p                | B (SE)              | p            | B (SE)                                                               | p            |
| <i>Social vulnerability and marginalization</i> |                              |                  |                     |                  |                     |              |                                                                      |              |
| Homelessness                                    | 0.20 (0.11)                  | 0.058            | 0.29 (0.25)         | 0.231            | <b>0.94</b> (0.37)  | <b>0.012</b> | 0.12 (0.61)                                                          | 0.846        |
| ACEs                                            | <b>0.08</b> (0.01)           | <b>&lt;0.001</b> | <b>0.14</b> (0.03)  | <b>&lt;0.001</b> | <b>0.14</b> (0.05)  | <b>0.006</b> | 0.11 (0.06)                                                          | 0.057        |
| LGBT                                            | <b>0.32</b> (0.07)           | <b>&lt;0.001</b> | <b>0.28</b> (0.14)  | <b>0.041</b>     | -0.18 (0.30)        | 0.558        | -0.32 (0.39)                                                         | 0.412        |
| Financial insecurity                            | <b>0.17</b> (0.02)           | <b>&lt;0.001</b> | <b>0.19</b> (0.05)  | <b>&lt;0.001</b> | <b>0.25</b> (0.09)  | <b>0.005</b> | 0.18 (0.13)                                                          | 0.182        |
| Justice system involvement                      | 0.16 (0.09)                  | 0.090            | 0.34 (0.19)         | 0.070            | <b>1.08</b> (0.31)  | <b>0.001</b> | <b>0.91</b> (0.39)                                                   | <b>0.018</b> |
| <i>Demographic factors</i>                      |                              |                  |                     |                  |                     |              |                                                                      |              |
| Age                                             | 0.10 (0.06)                  | 0.104            | 0.09 (0.13)         | 0.465            | 0.32 (0.23)         | 0.171        | 0.39 (0.24)                                                          | 0.105        |
| Male                                            | -0.08 (0.05)                 | 0.135            | -0.18 (0.11)        | 0.123            | 0.35 (0.23)         | 0.128        | 0.25 (0.28)                                                          | 0.372        |
| Nonwhite                                        | -0.11 (0.08)                 | 0.194            | -0.24 (0.17)        | 0.163            | 0.27 (0.30)         | 0.378        | 0.04 (0.39)                                                          | 0.924        |
| Washington State                                | -0.08 (0.05)                 | 0.118            | <b>-0.29</b> (0.11) | <b>0.010</b>     | 0.36 (0.23)         | 0.114        | 0.51 (0.28)                                                          | 0.071        |
| Family SES ^                                    | <b>-0.40</b> (0.06)          | <b>&lt;0.001</b> | <b>-0.32</b> (0.13) | <b>0.012</b>     | <b>-0.70</b> (0.24) | <b>0.004</b> | -0.01 (0.31)                                                         | 0.989        |

Note. Age was centered at the mean. Bolded effects are significant at  $p < 0.05$ . SES: socioeconomic status; b = unstandardized regression coefficient; B = log-odds regression coefficient; SE: standard error. ^ measured in adolescence.

**Table S2.** Univariate regression models of age 25 social vulnerability and marginalization associations with mental and substance use outcomes at age 28.

|                                                 | Self-reported Depression and Anxiety Symptoms |                  | Diagnosed Mood Disorder |                  | Diagnosed Anxiety Disorder |                  | Diagnosed Substance Use Disorder |                  |
|-------------------------------------------------|-----------------------------------------------|------------------|-------------------------|------------------|----------------------------|------------------|----------------------------------|------------------|
|                                                 | b (SE)                                        | p                | B (SE)                  | p                | B (SE)                     | p                | B (SE)                           | p                |
| <i>Social vulnerability and marginalization</i> |                                               |                  |                         |                  |                            |                  |                                  |                  |
| Young adult homelessness                        | <b>0.49</b> (0.13)                            | <b>&lt;0.001</b> | 0.34 (0.27)             | 0.201            | <b>0.60</b> (0.26)         | 0.018            | <b>1.78</b> (0.39)               | <b>&lt;0.001</b> |
| ACES                                            | <b>0.15</b> (0.01)                            | <b>&lt;0.001</b> | <b>0.29</b> (0.03)      | <b>&lt;0.001</b> | <b>0.24</b> (0.03)         | <b>&lt;0.001</b> | <b>0.30</b> (0.05)               | <b>&lt;0.001</b> |
| LGBTI                                           | <b>0.55</b> (0.07)                            | <b>&lt;0.001</b> | <b>1.07</b> (0.14)      | <b>&lt;0.001</b> | <b>0.96</b> (0.14)         | <b>&lt;0.001</b> | <b>1.01</b> (0.32)               | <b>0.002</b>     |
| Financial insecurity                            | <b>0.23</b> (0.03)                            | <b>&lt;0.001</b> | <b>0.34</b> (0.06)      | <b>&lt;0.001</b> | <b>0.29</b> (0.06)         | <b>&lt;0.001</b> | <b>0.58</b> (0.11)               | <b>&lt;0.001</b> |
| Justice involvement                             | <b>0.28</b> (0.11)                            | <b>0.008</b>     | -0.24 (0.24)            | 0.305            | 0.22 (0.21)                | 0.308            | <b>1.98</b> (0.38)               | <b>&lt;0.001</b> |
| <i>Demographics</i>                             |                                               |                  |                         |                  |                            |                  |                                  |                  |
| Age                                             | 0.04 (0.06)                                   | 0.578            | -0.10 (0.14)            | 0.496            | <b>-0.31</b> (0.14)        | <b>0.025</b>     | 0.02 (0.30)                      | 0.951            |
| Male                                            | <b>-0.24</b> (0.06)                           | <b>&lt;0.001</b> | <b>-0.78</b> (0.14)     | <b>&lt;0.001</b> | <b>-1.16</b> (0.14)        | <b>&lt;0.001</b> | -0.21 (0.33)                     | 0.528            |
| Nonwhite                                        | -0.11 (0.08)                                  | 0.186            | <b>-0.42</b> (0.20)     | <b>0.039</b>     | -0.32 (0.20)               | 0.100            | 0.17 (0.42)                      | 0.691            |
| Washington                                      | -0.08 (0.06)                                  | 0.167            | -0.07 (0.13)            | 0.600            | 0.06 (0.13)                | 0.633            | <b>1.59</b> (0.39)               | <b>&lt;0.001</b> |
| Family SES                                      | <b>-0.23</b> (0.07)                           | <b>0.001</b>     | -0.09 (0.15)            | 0.530            | 0.08 (0.14)                | 0.550            | -0.27 (0.29)                     | 0.367            |

Note. Age was centered at the mean. Bolded effects are significant at  $p < 0.05$ . SES: socioeconomic status; b = unstandardized regression coefficient; B = log-odds regression coefficient; SE: standard error.
